# Supplementary material for: Self-assembly fabrication of a graphene/multi-walled carbon nanotube hybrid material for suppressing potential heat radiation and toxic effluent
Source: Royal Society of Chemistry journal article supplement (doi:10.1039/c5ra19227g), 2015-01-01
Supplement: c5ra19227g1.pdf [file c5ra19227g1.pdf]

**Self-assembly fabrication of graphene/multi-walled carbon  
nanotube hybrid material for suppressing potential heat  
radiation and toxic effluent of polymer**

Lei Liu,<sup>\*,†</sup> Dong Wang,<sup>‡</sup> Yuan Hu,<sup>\*,‡</sup>

<sup>†</sup> School of Mechanical Engineering, Southeast University, Nanjing 210096,  
People's Republic of China

<sup>‡</sup> State Key Laboratory of Fire Science, University of Science and Technology of  
China, 96 Jinzhai Road, Hefei, Anhui 230026, P. R. China

**Corresponding Author**

\*Tel./Fax: +86-25-52090501. E-mail: liulei@seu.edu.cn.

\*Tel./Fax: +86-551-63601664. E-mail: yuanhu@ustc.edu.cn.

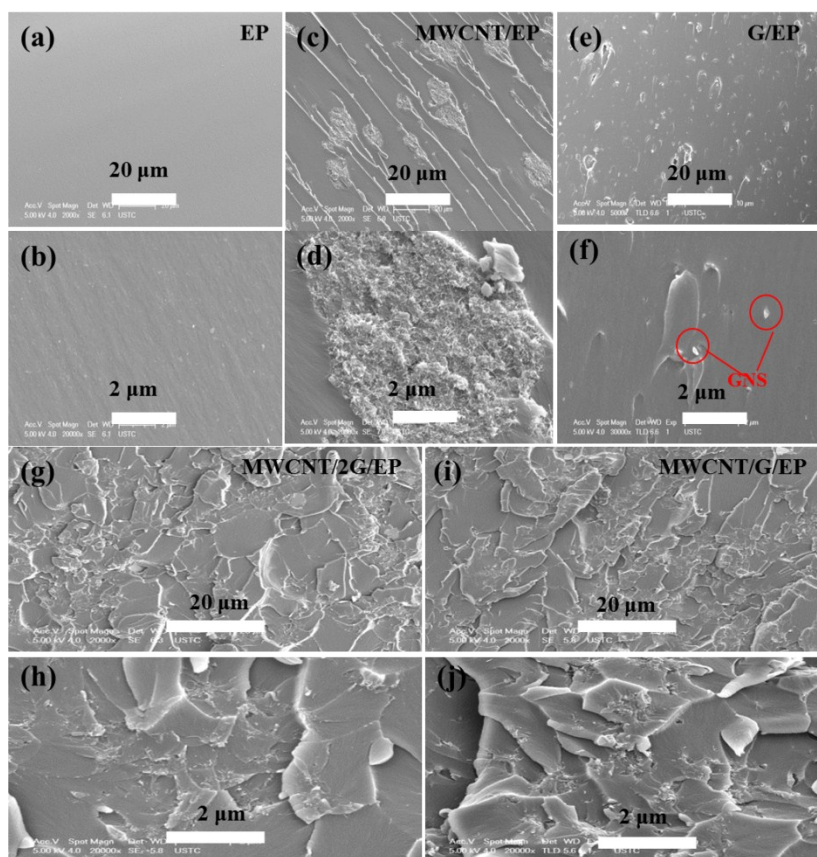

**Fig. S1** SEM images of fractured surface of pure epoxy and its composites.

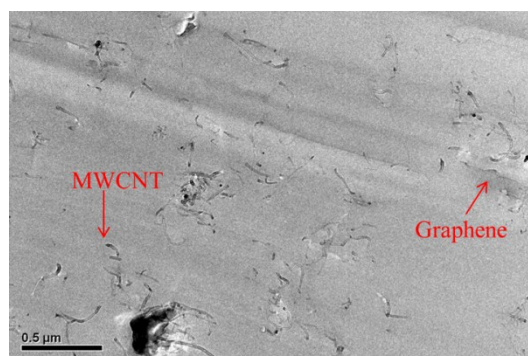

**Fig. S2** TEM image of the ultrathin section for MWCNT/G/EP composite.

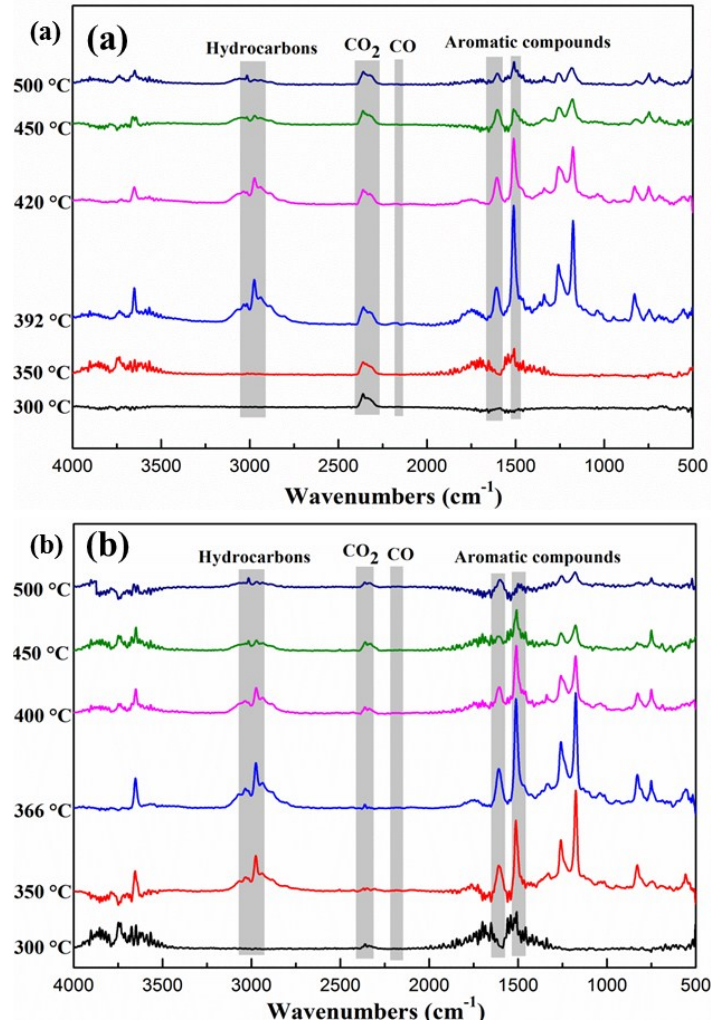

**Fig. S3** FT-IR spectra of gaseous products for neat EP (a) and MWCNT/G/EP composite (b) at different stages of pyrolysis process.

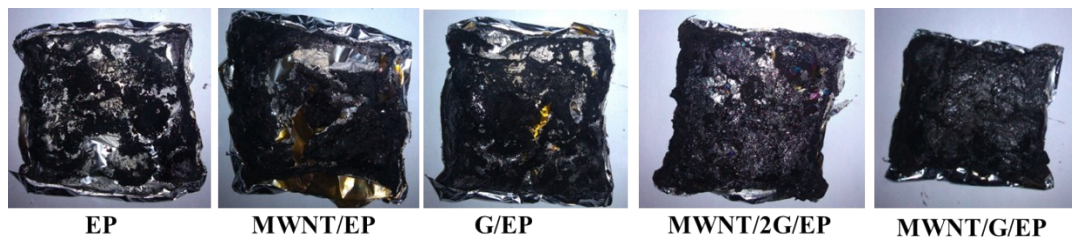

**Fig. S4** Digital photos of residual chars for pure EP and its composites after cone tests.
